# Supplementary material
Source: HighWire-hosted journal article supplement (https://jnis.bmj.com/content/12/6/621)
Supplement: inline-supplementary-material-2 [file inline-supplementary-material-2.pdf]

Supplemental Table I - Surgical characteristics of each group.

| Experimental groups                                  | VA & Coil-3<br>(n = 8) | VA & Coil-7<br>(n = 6) | VA & Coil-21<br>(n = 6) | VA & Coil-90<br>(n = 7) | DA & Coil-3<br>(n = 6) | DA & Coil-7<br>(n = 6) | DA & Coil-21<br>(n = 7) | DA & Coil-90<br>(n = 6) | Over all<br>(n = 68) |
|------------------------------------------------------|------------------------|------------------------|-------------------------|-------------------------|------------------------|------------------------|-------------------------|-------------------------|----------------------|
| Mean body weight at surgery<br>(grams)               | 438<br>± 29            | 411<br>± 20            | 426<br>± 40             | 494<br>± 22             | 458<br>± 41            | 447<br>± 29            | 478<br>± 34             | 436<br>± 48             | 431<br>± 51          |
| Mean body weight at follow-up<br>(grams)             | 407<br>± 36            | 404<br>± 20            | 471<br>± 43             | 552<br>± 26             | 434<br>± 40            | 451<br>± 26            | 556<br>± 43             | 592<br>± 55             | 471<br>± 73          |
| Mean surgery time<br>(minutes)                       | 140<br>± 37            | 147<br>± 10            | 146<br>± 17             | 73<br>± 9               | 120<br>± 32            | N/A                    | 116<br>± 20             | 73<br>± 7               | 108<br>± 18          |
| Mean aortic clamping time<br>(minutes)               | 52.5<br>± 8.01         | 68.666<br>± 2.08       | 46.75<br>± 8.03         | 32.37<br>± 6.63         | 60<br>± 13.08          | N/A                    | 52.75<br>± 14.17        | 29.33<br>± 3.83         | 46<br>± 4            |
| Mean anastomosis time<br>(minutes)                   | 37.375<br>± 11.16      | 46.333<br>± 11.93      | 33.5<br>± 5.06          | 20.57<br>± 1.99         | 41.333<br>± 9.42       | N/A                    | 32.75<br>± 6.24         | 22.5<br>± 3.21          | 31<br>± 4            |
| Mean graft ischemia<br>(minutes)                     | 74.286<br>± 18.59      | 78.5<br>± 0.7          | 68.25<br>± 5.38         | 32.42<br>± 3.1          | N/A                    | N/A                    | N/A                     | N/A                     | 59<br>± 7            |
| Mean aneurysm length<br>(millimeters)                | 3.688<br>± 0.37        | 3.75<br>± 0.27         | 3.7<br>± 0.63           | 3.71<br>± 0.49          | 4.083<br>± 0.74        | 3.75<br>± 0.69         | 4.179<br>± 0.47         | 4<br>± 0.45             | 3.82<br>± 0.15       |
| Mean aneurysm width<br>(millimeters)                 | 2.438<br>± 0.42        | 2.416<br>± 0.49        | 2.583<br>± 0.38         | 2.57<br>± 0.19          | 2.333<br>± 0.41        | 2.333<br>± 0.26        | 2.429<br>± 0.19         | 2.75<br>± 0.42          | 2.52<br>± 0.11       |
| Mean aneurysm depth<br>(millimeters)                 | 2                      | 2                      | 2                       | 2.07<br>± 0.19          | 2                      | 2                      | 2                       | 2.06<br>± 0.17          | 2.01<br>± 0.08       |
| Mean aneurysm volume baseline<br>(mm <sup>3</sup> )  | 14.137<br>± 2.823      | 14.268<br>± 3.235      | 14.962<br>± 3.104       | 15.652<br>± 3.479       | 15.119<br>± 4.328      | 13.81<br>± 3.391       | 15.848<br>± 1.193       | 17.41<br>± 4.139        | 15.217<br>± 0.926    |
| Mean aneurysm volume follow-up<br>(mm <sup>3</sup> ) | 14.432<br>± 1.966      | 18.195<br>± 5.716      | 21.108<br>± 17.604      | 16.886<br>± 3.15        | 17.213<br>± 2.781      | 33.837<br>± 22.415     | 17.167<br>± 3.964       | 22.188<br>± 8.588       | 21.707<br>± 7.695    |

VA – vital aneurysm. DA – decellularized aneurysms. N/A – data not available.
